# Supplementary material
Source: publisher figshare collection journal article supplement (https://asha.figshare.com/articles/dataset/_/21614271)

**Supplemental Material S4.** Results of leave-one-out sensitivity analysis sorted by heterogeneity ( $I^2$ ). The shaded area with a dashed line in its center represents the estimated pooled effect and its 95% confidence interval of included studies.

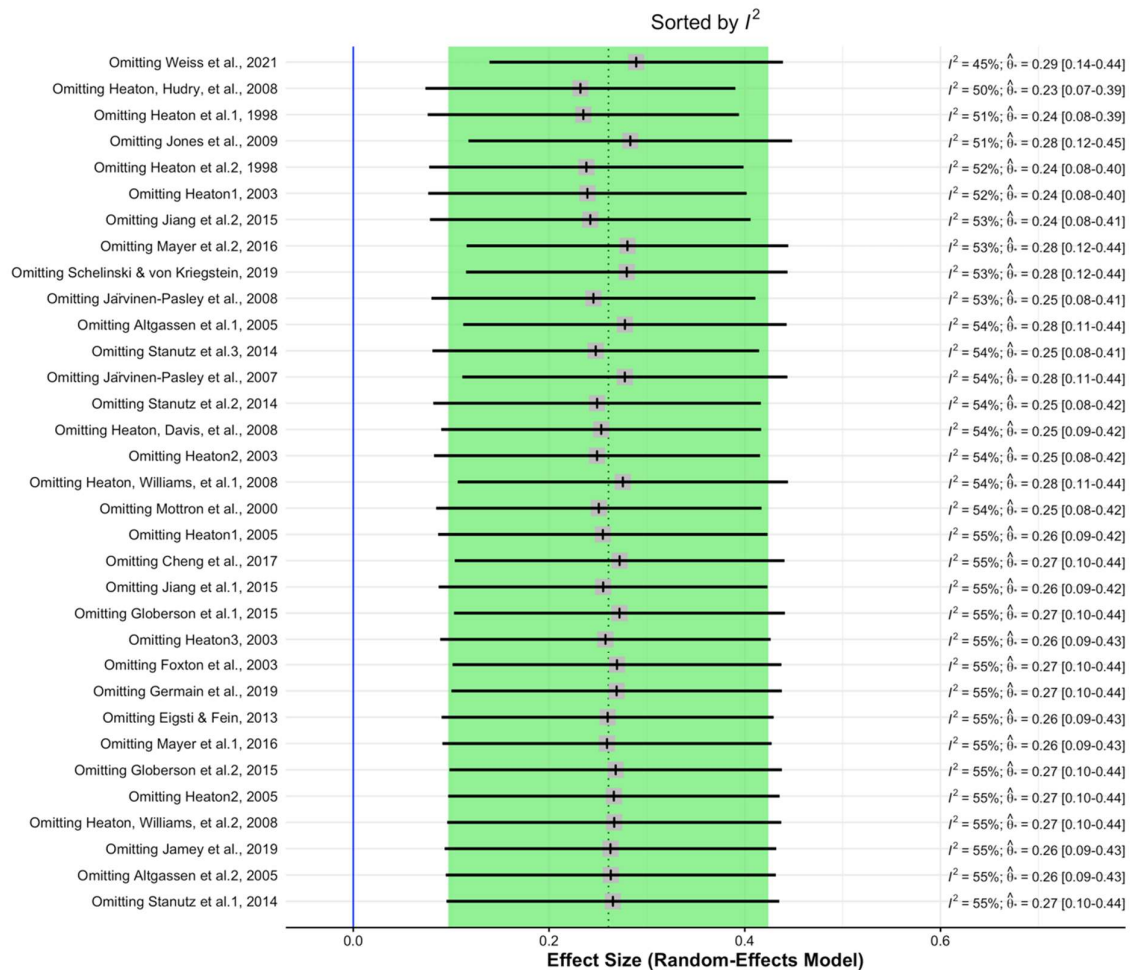

Supplement: Supplementary file 2 [file 1]
