# Supplementary material
Source: publisher figshare collection journal article supplement (https://asha.figshare.com/articles/dataset/_/21614271)

**Supplemental Material S5.** Forest plot after removing outliers. Forest plot with effect size (Hedges's  $g$ ) and confidence intervals for included studies after the removal of three outliers. Grey squares depict individual effect sizes of pitch processing in ASD compared with TD, with sizes indicating the relative weight of each study's effect size estimate to the analysis. Blue diamond reflects the overall pooling effect across studies.

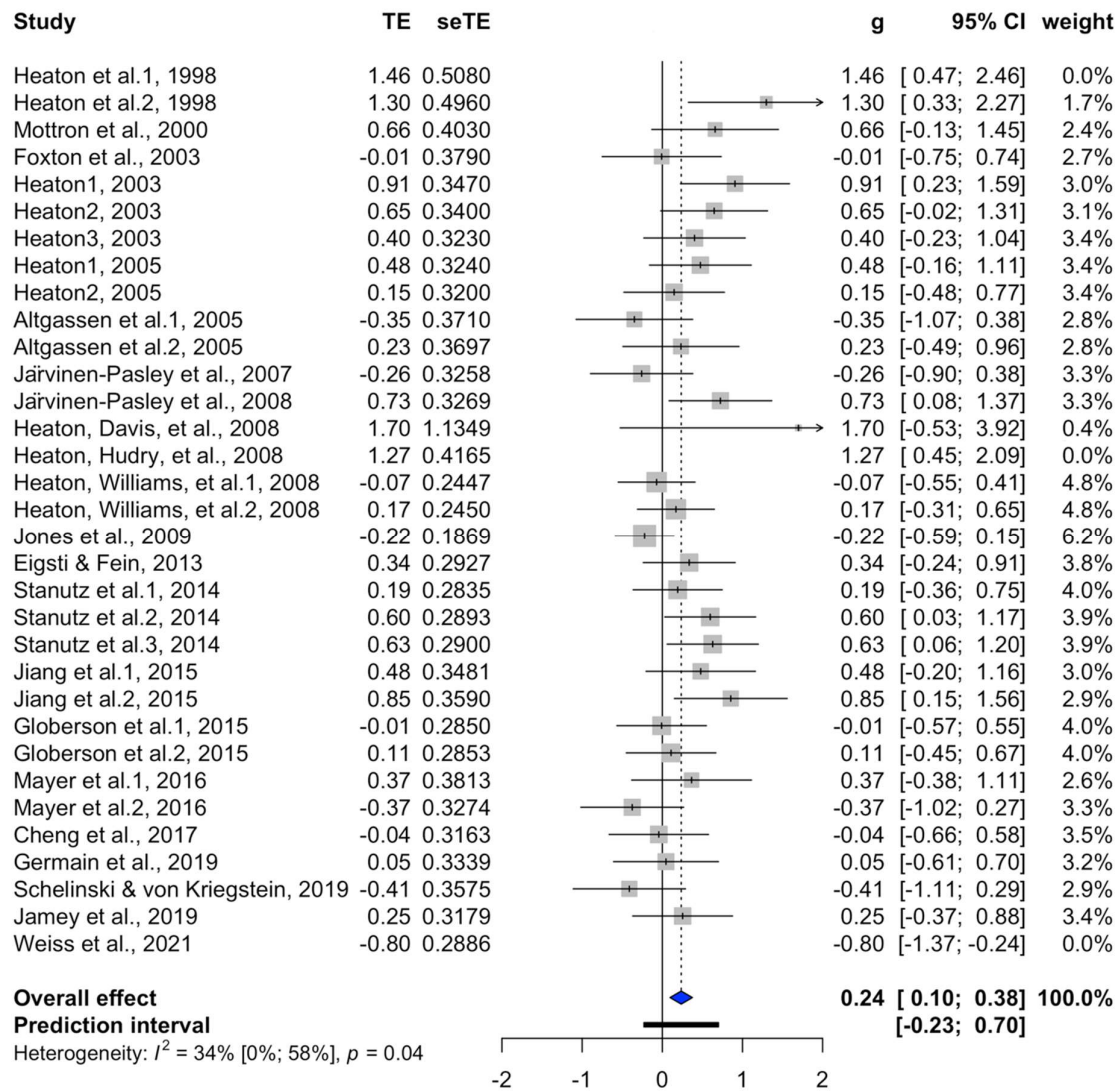

Supplement: Supplementary file 4 [file 1]
