# Supplementary material
Source: publisher figshare collection journal article supplement (https://asha.figshare.com/articles/dataset/_/21614271)

**Supplemental Material S7.** Funnel plot. The effect size for each study (Hedges's  $g$ ) is plotted against the standard error. Filled circles indicate studies in the meta-analysis. Open circles indicate studies imputed in the trim-and-fill analysis.

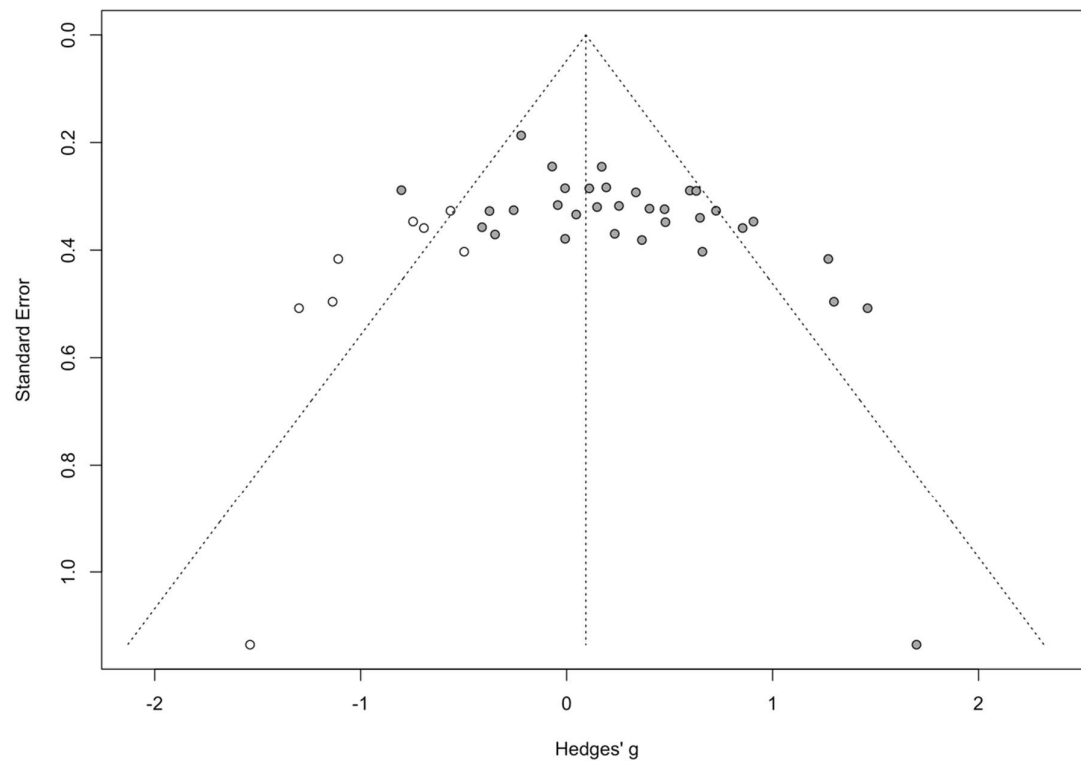

Supplement: Supplementary file 5 [file 1]
