# Supplementary material
Source: publisher figshare collection journal article supplement (https://asha.figshare.com/articles/dataset/_/21614271)
Supplement: Supplementary file 6 [file 1]

**Supplemental Material S3.** Overall pitch processing performance (accuracy) of ASD participants.

|     | Year | First author    | Hedges's <i>g</i><br>(Variance) | <i>SE</i><br>( <i>g</i> ) | 95% CI         | Type of participants<br>(number) | Task paradigm | Quality<br>index<br>score | Main Results        |        |                 |
|-----|------|-----------------|---------------------------------|---------------------------|----------------|----------------------------------|---------------|---------------------------|---------------------|--------|-----------------|
|     |      |                 |                                 |                           |                |                                  |               |                           | Mean ( <i>SD</i> )* |        | Effect of group |
|     |      |                 |                                 |                           |                |                                  |               |                           | ASD                 | TD     |                 |
| 1a  | 1998 | Heaton          | 1.461 (0.2582)                  | 0.508                     | [0.465,2.457]  | ASD (10)-TD (10)                 | PL            | 0.82                      | 11.7                | 5.8    | ▲               |
| 1b  | 1998 | Heaton          | 1.2978 (0.2459)                 | 0.496                     | [0.326,2.270]  | ASD (10)-TD (10)                 | PM            | 0.82                      | 8.9                 | 4      | ▲               |
| 2   | 2000 | Mottron         | 0.6591 (0.1628)                 | 0.403                     | [-0.132,1.450] | ASD (13)-TD (13)                 | PC            | 0.91                      | 67.92               | 56.64  | ●               |
| 3   | 2003 | Foxton          | -0.0074 (0.1436)                | 0.379                     | [-0.75,0.735]  | ASD (13)-TD (15)                 | PC            | 0.86                      | 12.222              | 12.24  | ●               |
| 4a  | 2003 | Heaton          | 0.907 (0.121)                   | 0.347                     | [0.226,1.288]  | ASD (14)-TD (26)                 | PM            | 0.81                      | 11.21               | 6.355  | ▲               |
| 4b  | 2003 | Heaton          | 0.6474 (0.1153)                 | 0.340                     | [-0.018,1.313] | ASD (14)-TD (26)                 | PCD           | 0.81                      | 7.5                 | 4      | ▲               |
| 4c  | 2003 | Heaton          | 0.4022 (0.1043)                 | 0.323                     | [-0.231,1.035] | ASD (15)-TD (28)                 | PCD           | 0.81                      | F = 1.64            |        | ●               |
| 5a  | 2005 | Heaton          | 0.4753 (0.1051)                 | 0.324                     | [-0.16,1.111]  | ASD (15)-TD (28)                 | PDR           | 0.81                      | 12.49               | 11.35  | ●               |
| 5b  | 2005 | Heaton          | 0.1477 (0.1026)                 | 0.320                     | [-0.48,0.776]  | ASD (15)-TD (28)                 | PC            | 0.81                      | 6.33                | 6.09   | ●               |
| 6a  | 2005 | Altgassen       | -0.3478 (0.1379)                | 0.371                     | [-1.076,0.380] | ASD (17)-TD (13)                 | PL            | 0.86                      | 3.29                | 4.23   | ●               |
| 6b  | 2005 | Altgassen       | 0.2333 (0.1367)                 | 0.370                     | [-0.491,0.958] | ASD (17)-TD (13)                 | PCD           | 0.86                      | 3.15                | 2.73   | ●               |
| 7   | 2007 | Järvinen-Pasley | -0.2573 (0.1062)                | 0.326                     | [-0.896,0.381] | ASD (19)-TD (19)                 | PC            | 0.86                      | t = - 0.81          |        | ●               |
| 8   | 2008 | Järvinen-Pasley | 0.7253 (0.1068)                 | 0.327                     | [0.085,1.366]  | ASD (20)-TD (20)                 | PCI           | 0.86                      | t = 2.34            |        | ▲               |
| 9   | 2008 | Heaton, Davis   | 1.6986 (1.2879)                 | 1.135                     | [-0.526,3.923] | ASD (1)-TD (9)                   | PN            | 0.68                      | 152                 | 117.21 | ▲               |
| 10  | 2008 | Heaton, Hudry   | 1.2704 (0.1734)                 | 0.417                     | [0.454,2.087]  | ASD (14)-TD (14)                 | PHD           | 0.91                      | 34                  | 24.9   | ▲               |
| 11a | 2008 | Heaton, Walliam | -0.0704 (0.0599)                | 0.245                     | [-0.550,0.409] | ASD (32)-TD (35)                 | PDR           | 0.91                      | 12.27               | 12.85  | ●               |
| 11b | 2008 | Heaton, Walliam | 0.1703 (0.060)                  | 0.245                     | [-0.310,0.651] | ASD (32)-TD (35)                 | PM            | 0.91                      | 15.34               | 13.78  | ●               |
| 12  | 2009 | Jones           | -0.2209 (0.0349)                | 0.187                     | [-0.587,0.145] | ASD (72)-TD (48)                 | PHD           | 0.95                      | 1.02                | 1.12   | ●               |
| 13  | 2013 | Eigsti          | 0.336 (0.0857)                  | 0.293                     | [-0.238,0.910] | ASD (29)-TD (20)                 | PHD           | 0.91                      | F = 1.38            |        | ▲               |
| 14a | 2014 | Stanutz         | 0.1922 (0.0804)                 | 0.284                     | [-0.364,0.748] | ASD (25)-TD (25)                 | PHD           | 0.86                      | 9.06                | 8.12   | ●               |

|     | Year | First author | Hedges's <i>g</i><br>(Variance) | <i>SE</i><br>( <i>g</i> ) | 95% CI           | Type of participants<br>(number) | Task paradigm | Quality<br>index<br>score | Main Results        |        |                 |
|-----|------|--------------|---------------------------------|---------------------------|------------------|----------------------------------|---------------|---------------------------|---------------------|--------|-----------------|
|     |      |              |                                 |                           |                  |                                  |               |                           | Mean ( <i>SD</i> )* |        | Effect of group |
|     |      |              |                                 |                           |                  |                                  |               |                           | ASD                 | TD     |                 |
| 14b | 2014 | Stanutz      | 0.598 (0.0837)                  | 0.289                     | [0.031,1.165]    | ASD (25)-TD (25)                 | PC            | 0.86                      | 9.76                | 8.12   | ▲               |
| 14c | 2014 | Stanutz      | 0.6292 (0.0841)                 | 0.290                     | [0.061,1.198]    | ASD (25)-TD (25)                 | PM            | 0.86                      | 12.25               | 10.17  | ▲               |
| 15a | 2015 | Jiang        | 0.4795 (0.1212)                 | 0.348                     | [-0.203,1.162]   | ASD (17)-TD (17)                 | PC            | 0.77                      | <i>F</i> = 2.05     |        | ●               |
| 15b | 2015 | Jiang        | 0.8545 (0.1289)                 | 0.359                     | [0.151,1.558]    | ASD (17)-TD (17)                 | PCI           | 0.77                      | <i>F</i> = 6.51     |        | ▲               |
| 16a | 2015 | Globerson    | -0.0078 (0.0813)                | 0.285                     | [-0.567,0.551]   | ASD (20)-TD (32)                 | PDR           | 0.91                      | 44.9                | 45.4   | ●               |
| 16b | 2015 | Globerson    | 0.1098 (0.0814)                 | 0.285                     | [-0.449,0.669]   | ASD (20)-TD (32)                 | PHD           | 0.91                      | 25.7                | 21.47  | ●               |
| 17a | 2016 | Mayer        | 0.3654 (0.1454)                 | 0.381                     | [-0.382,1.113]   | ASD (14)-TD (14)                 | PHD           | 0.95                      | 32                  | 29     | ●               |
| 17b | 2016 | Mayer        | -0.3747 (0.1072)                | 0.327                     | [-1.016,0.267]   | ASD (19)-TD (19)                 | PHD           | 0.95                      | 32.52               | 35.21  | ●               |
| 18  | 2017 | Cheng        | -0.0432 (0.1)                   | 0.316                     | [-0.663,0.577]   | ASD (20)-TD (20)                 | PHD           | 0.91                      | 21.91               | 22.14  | ●               |
| 19  | 2019 | Germain      | 0.0462 (0.1115)                 | 0.334                     | [-0.608,0.701]   | ASD (17)-TD (19)                 | PDR           | 0.86                      | <i>F</i> = 0.02     |        | ●               |
| 20  | 2019 | Schelinski   | -0.4108 (0.1278)                | 0.358                     | [-1.111,0.290]   | ASD (16)-TD (16)                 | PC            | 0.91                      | 44.43               | 46.202 | ●               |
| 21  | 2019 | Jamey        | 0.254 (0.1011)                  | 0.318                     | [-0.369,0.877]   | ASD (19)-TD (21)                 | PC            | 0.86                      | <i>F</i> = 0.67     |        | ●               |
| 22  | 2021 | Weiss        | -0.8025 (0.0833)                | 0.289                     | [-1.368, -0.237] | ASD (26)-TD (26)                 | PM            | 0.91                      | 0.45                | 0.63   | ▲               |

Note: (1) Negative effect size Hedges's *g* indicates lower accuracy in ASD participants compared to TD controls; (2) ASD = autism spectrum disorder; TD = typical developing people; ▲ = significant difference ( $p < .05$ ); ● = non-significant difference; (3) The data were collected based on the accuracy rate reported in the included studies.

\**F* values or *t* values are presented when means and SDs were not reported.
