# Supplementary material
Source: publisher figshare collection journal article supplement (https://asha.figshare.com/articles/dataset/_/21614271)
Supplement: Supplementary file 7 [file 1]

Supplemental Material S2. Characteristics of studies included in quantitative synthesis.

|      |              |                     |                    |                                        |                                              | Participant information |                       |             |                               |                        |                                   |                |                |                   |     |              |                       |             |                                    |              |                |                   |             |     |     |              |               |             |
|------|--------------|---------------------|--------------------|----------------------------------------|----------------------------------------------|-------------------------|-----------------------|-------------|-------------------------------|------------------------|-----------------------------------|----------------|----------------|-------------------|-----|--------------|-----------------------|-------------|------------------------------------|--------------|----------------|-------------------|-------------|-----|-----|--------------|---------------|-------------|
|      |              |                     |                    |                                        |                                              | ASD sample              |                       |             |                               |                        |                                   |                |                |                   |     | TD sample    |                       |             |                                    |              |                |                   |             |     |     |              |               |             |
| Year | First author | Country<br>Language | Task<br>paradigm   | Stimulus<br>modality:<br>stimulus form | Response<br>option                           | N<br>(male%)            | Sex<br>ratio<br>(M:F) | Age<br>(SD) | Diagnosis<br>criteria<br>used | SCQ                    | IQ (WISC/WAIS); PPVT/BPVS;RSPM/RM |                |                |                   |     | N<br>(male%) | Sex<br>ratio<br>(M:F) | Age<br>(SD) | IQ (WISC/WAIS); PPVT/BPVS; RSPM/RM |              |                |                   |             |     |     |              |               |             |
|      |              |                     |                    |                                        |                                              |                         |                       |             |                               |                        |                                   |                |                |                   |     |              |                       |             | FIQ                                | VIQ          | PIQ/<br>NVIQ   | PPVT/<br>BPVS     | RSPM/<br>RM | FIQ | VIQ | PIQ/<br>NVIQ | PPVT/<br>BPVS | RSPM/<br>RM |
|      |              |                     |                    |                                        |                                              |                         |                       |             |                               |                        |                                   |                |                |                   |     |              |                       |             |                                    |              |                |                   |             |     |     |              |               |             |
| 1a   | 1998         | Heaton              | The UK/<br>English | PL                                     | A: isolated tone<br><br>V: animal<br>picture | L                       | 10<br>(100%)          | 10:0        | 9.9                           | Confirmed<br>diagnosis | N/A                               | 85.5           | N/A            | N/A               | N/A | N/A          | 10<br>(100%)          | 10:0        | 8.1<br>(N/A)                       | N/A          | N/A            | N/A               | N/A         | N/A |     |              |               |             |
| 1b   | 1998         | Heaton              | The UK/<br>English | PM                                     | A: isolated tone<br><br>V: animal<br>picture | L                       | 10<br>(100%)          | 10:0        | 9.9                           | Confirmed<br>diagnosis | N/A                               | 85.5           | N/A            | N/A               | N/A | N/A          | 10<br>(100%)          | 10:0        | 8.1<br>(N/A)                       | N/A          | N/A            | N/A               | N/A         | N/A |     |              |               |             |
| 2    | 2000         | Mottron             | Canada/<br>English | PC                                     | A: melodic<br>contour                        | C                       | 13<br>(84.62<br>%)    | 11:2        | 16.73<br>(6.9)                | ADI-R,<br>DSM-IV       | N/A                               | > 80           | N/A            | 106.69<br>(11.13) | N/A | N/A          | 13<br>(100%)          | 13:0        | 15.33<br>(3.41)                    | >80          | N/A            | 105.54<br>(11.24) | N/A         | N/A |     |              |               |             |
| 3    | 2003         | Foxton              | The UK/<br>English | PC                                     | A: melodic<br>contour                        | C                       | 13<br>(84.62<br>%)    | 11:2        | 18.1 (2)                      | DSM-IV                 | N/A                               | 87.9<br>(10.9) | 92.5<br>(14.5) | 83.9<br>(8.1)     | N/A | N/A          | 15<br>(86.67%)        | 13:2        | 17.7<br>(2.2)                      | 89.1<br>(10) | 91.2<br>(10.9) | 88<br>(10.7)      | N/A         | N/A |     |              |               |             |
| 4a   | 2003         | Heaton              | The UK/<br>English | PM                                     | A: isolated tone<br><br>V: animal<br>picture | L                       | 14<br>(N/A)           | N/A         | 10.75<br>(N/A)                | Confirmed<br>diagnosis | N/A                               | N/A            | N/A            | N/A               | 93  | 108          | 26                    | N/A         | N/A                                | N/A          | N/A            | N/A               | N/A         | N/A |     |              |               |             |
| 4b   | 2003         | Heaton              | The UK/<br>English | PCD                                    | A: melodic<br>contour                        | C                       | 14<br>(N/A)           | N/A         | 10.75<br>(N/A)                | Confirmed<br>diagnosis | N/A                               | N/A            | N/A            | N/A               | 93  | 108          | 26                    | N/A         | N/A                                | N/A          | N/A            | N/A               | N/A         | N/A |     |              |               |             |

| Participant information |              |                     |                    |          |                                                         |            |                    |                            |                 |                        |     |     |           |     |                                   |               |                |          |                 |     |     |     |                                    |               |              |               |             |     |     |              |               |             |
|-------------------------|--------------|---------------------|--------------------|----------|---------------------------------------------------------|------------|--------------------|----------------------------|-----------------|------------------------|-----|-----|-----------|-----|-----------------------------------|---------------|----------------|----------|-----------------|-----|-----|-----|------------------------------------|---------------|--------------|---------------|-------------|-----|-----|--------------|---------------|-------------|
| Year                    | First author | Country             | Task               | Stimulus | Response                                                | ASD sample |                    |                            |                 |                        |     |     |           |     |                                   | TD sample     |                |          |                 |     |     |     |                                    |               |              |               |             |     |     |              |               |             |
|                         |              |                     |                    |          |                                                         | Language   | paradigm           | modality:<br>stimulus form | option          | N                      | Sex | Age | Diagnosis | SCQ | IQ (WISC/WAIS); PPVT/BPVS;RSPM/RM |               |                |          |                 | N   | Sex | Age | IQ (WISC/WAIS); PPVT/BPVS; RSPM/RM |               |              |               |             |     |     |              |               |             |
|                         |              |                     |                    |          |                                                         |            |                    |                            |                 |                        |     |     |           |     | (male%)                           | ratio         | (SD)           | criteria | used            |     |     |     | FIQ                                | VIQ           | PIQ/<br>NVIQ | PPVT/<br>BPVS | RSPM/<br>RM | FIQ | VIQ | PIQ/<br>NVIQ | PPVT/<br>BPVS | RSPM/<br>RM |
|                         |              |                     |                    |          |                                                         |            |                    |                            |                 |                        |     |     |           |     |                                   |               |                |          |                 |     |     |     |                                    |               |              |               |             |     |     |              |               |             |
| 4c                      | 2003         | Heaton              | The UK/<br>English | PCD      | A: melodic<br>contour                                   | C          | 15                 | N/A                        | 10<br>(N/A)     | Confirmed<br>diagnosis | N/A | N/A | N/A       | N/A | 92                                | 107           | 28             | N/A      | N/A             | N/A | N/A | N/A | N/A                                | N/A           |              |               |             |     |     |              |               |             |
| 5a                      | 2005         | Heaton              | The UK/<br>English | PDR      | A: pitch interval                                       | C          | 15                 | N/A                        | 10<br>(N/A)     | Confirmed<br>diagnosis | N/A | N/A | N/A       | N/A | 92                                | 107           | 28             | N/A      | N/A             | N/A | N/A | N/A | N/A                                | N/A           |              |               |             |     |     |              |               |             |
| 5b                      | 2005         | Heaton              | The UK/<br>English | PC       | A: melodic<br>contour                                   | C          | 15                 | N/A                        | 10<br>(N/A)     | Confirmed<br>diagnosis | N/A | N/A | N/A       | N/A | 92                                | 107           | 28             | N/A      | N/A             | N/A | N/A | N/A | N/A                                | N/A           |              |               |             |     |     |              |               |             |
| 6a                      | 2005         | Altgassen           | The UK/<br>English | PL       | A: isolated tone<br>V: animal<br>picture                | L          | 17<br>(100%)       | 17:0                       | 9.34<br>(1.12)  | DSM-IV                 | N/A | N/A | N/A       | N/A | 80.94<br>(18.69)                  | N/A           | 13<br>(100%)   | 13:0     | 9.13<br>(1.68)  | N/A | N/A | N/A | 106.15<br>(11.54)                  | N/A           |              |               |             |     |     |              |               |             |
| 6b                      | 2005         | Altgassen           | The UK/<br>English | PCD      | A: melodic<br>contour<br>V: animal<br>picture           | L          | 17<br>(100%)       | 17:0                       | 9.34<br>(1.12)  | DSM-IV                 | N/A | N/A | N/A       | N/A | 80.94<br>(18.69)                  | N/A           | 13<br>(100%)   | 13:0     | 9.13<br>(1.68)  | N/A | N/A | N/A | 106.15<br>(11.54)                  | N/A           |              |               |             |     |     |              |               |             |
| 7                       | 2007         | Järvinen-<br>Pasley | The UK/<br>English | PC       | A: melodic<br>contour                                   | C          | 19<br>(84.21<br>%) | 16:3                       | 11.55<br>(2.34) | DSM-IV                 | N/A | N/A | N/A       | N/A | 92<br>(17.39)                     | 94<br>(10.81) | 19<br>(68.42%) | 13:6     | 11.68<br>(2.21) | N/A | N/A | N/A | 95<br>(16.03)                      | 91<br>(14.31) |              |               |             |     |     |              |               |             |
| 8                       | 2008         | Järvinen-<br>Pasley | The UK/<br>English | PCI      | A: melodic<br>contour<br>V: picture of<br>pitch contour | C          | 20<br>(85%)        | 17:3                       | 12.55<br>(2.57) | DSM-IV                 | N/A | N/A | N/A       | N/A | 84<br>(19.83)                     | 87<br>(14.43) | 20 (80%)       | 16:4     | 12.03<br>(2.62) | N/A | N/A | N/A | 83<br>(20.11)                      | 84<br>(16.12) |              |               |             |     |     |              |               |             |

| Participant information |              |                     |                    |                                        |                                                 |              |                       |             |                               |                        |                                   |                  |                  |                  |               |                  |                       |             |                                    |                  |                  |                  |                  |                  |
|-------------------------|--------------|---------------------|--------------------|----------------------------------------|-------------------------------------------------|--------------|-----------------------|-------------|-------------------------------|------------------------|-----------------------------------|------------------|------------------|------------------|---------------|------------------|-----------------------|-------------|------------------------------------|------------------|------------------|------------------|------------------|------------------|
| Year                    | First author | Country<br>Language | Task<br>paradigm   | Stimulus<br>modality:<br>stimulus form | Response<br>option                              | ASD sample   |                       |             |                               |                        |                                   |                  |                  |                  |               | TD sample        |                       |             |                                    |                  |                  |                  |                  |                  |
|                         |              |                     |                    |                                        |                                                 | N<br>(male%) | Sex<br>ratio<br>(M:F) | Age<br>(SD) | Diagnosis<br>criteria<br>used | SCQ                    | IQ (WISC/WAIS); PPVT/BPVS;RSPM/RM |                  |                  |                  |               | N<br>(male%)     | Sex<br>ratio<br>(M:F) | Age<br>(SD) | IQ (WISC/WAIS); PPVT/BPVS; RSPM/RM |                  |                  |                  |                  |                  |
|                         |              |                     |                    |                                        |                                                 |              |                       |             |                               |                        | FIQ                               | VIQ              | PIQ/<br>NVIQ     | PPVT/<br>BPVS    | RSPM/<br>RM   |                  |                       |             | FIQ                                | VIQ              | PIQ/<br>NVIQ     | PPVT/<br>BPVS    | RSPM/<br>RM      |                  |
|                         |              |                     |                    |                                        |                                                 |              |                       |             |                               |                        |                                   |                  |                  |                  |               |                  |                       |             |                                    |                  |                  |                  |                  |                  |
| 9                       | 2008         | Heaton,<br>Davis    | The UK/<br>English | PN                                     | A: isolated tone                                | C            | 1<br>(100%)           | 1:0         | 35                            | Confirmed<br>diagnosis | N/A                               | N/A              | N/A              | N/A              | N/A           | N/A              | 9                     | N/A         | 32.89<br>(14.31)                   | N/A              | N/A              | N/A              | N/A              | N/A              |
| 10                      | 2008         | Heaton,<br>Hudry    | The UK/<br>English | PHD                                    | A: melodic<br>contour                           | C            | 14<br>(100%)          | 14:0        | 10.5<br>(3.96)                | ICD-10                 | N/A                               | N/A              | N/A              | N/A              | 82.36<br>(18) | N/A              | 14<br>(92.86%)        | 13:1        | 10.52<br>(2.37)                    | N/A              | N/A              | N/A              | 77.71<br>(13.94) | N/A              |
| 11a                     | 2008         | Heaton,<br>Walliam  | The UK/<br>English | PDR                                    | A: pitch interval<br>V: picture of<br>staircase | C            | 32                    | N/A         | 14.5<br>(2.25)                | Confirmed<br>diagnosis | N/A                               | N/A              | N/A              | N/A              | N/A           | 78.56<br>(16.19) | 35                    | N/A         | 14<br>(1.5)                        | N/A              | N/A              | N/A              | N/A              | 79.54<br>(15.48) |
| 11b                     | 2008         | Heaton,<br>Walliam  | The UK/<br>English | PM                                     | A: isolated tone<br>V: picture of<br>staircase  | C            | 32                    | N/A         | 14.5<br>(2.25)                | Confirmed<br>diagnosis | N/A                               | N/A              | N/A              | N/A              | N/A           | 78.56<br>(16.19) | 35                    | N/A         | 14<br>(1.5)                        | N/A              | N/A              | N/A              | N/A              | 79.54<br>(15.48) |
| 12                      | 2009         | Jones               | The UK/<br>English | PHD                                    | A: pitch interval                               | C            | 72<br>(91.67<br>%)    | 66:6        | 15.5<br>(0.475)               | ICD-10,<br>ADOS-G      | N/A                               | 87.79<br>(17.32) | 84.31<br>(17.41) | 93.36<br>(17.44) | N/A           | N/A              | 48<br>(95.83%)        | 46:2        | 15.5<br>(0.49)                     | 89.33<br>(21.53) | 87.25<br>(19.70) | 92.83<br>(21.15) | N/A              | N/A              |
| 13                      | 2013         | Eigsti              | USA/<br>English    | PHD                                    | A: pitch interval                               | C            | 29<br>(86.21<br>%)    | 25:4        | 12.3<br>(2.3)                 | ADOS,<br>ADI-R         | 23<br>(5.9)                       | N/A              | 104<br>(13)      | 111<br>(14)      | N/A           | N/A              | 20 (85%)              | 17:3        | 13.7<br>(2.9)                      | N/A              | 113<br>(12)      | 115<br>(12)      | N/A              | N/A              |
| 14a                     | 2014         | Stanutz             | Canada/<br>English | PHD                                    | A: pitch interval                               | C            | 25<br>(76%)           | 19:6        | 10.67<br>(N/A)                | DSM-IV                 | N/A                               | >70              | N/A              | N/A              | N/A           | N/A              | 25 (44%)              | 11:14       | 10.42<br>(N/A)                     | N/A              | N/A              | N/A              | N/A              | N/A              |

|     | Year | First author | Country<br>Language | Task<br>paradigm | Stimulus<br>modality:<br>stimulus form                  | Response<br>option | Participant information |                       |                |                               |                 |                                   |     |              |                    |                   |              |                       |                 |                                    |     |              |                   |                 |
|-----|------|--------------|---------------------|------------------|---------------------------------------------------------|--------------------|-------------------------|-----------------------|----------------|-------------------------------|-----------------|-----------------------------------|-----|--------------|--------------------|-------------------|--------------|-----------------------|-----------------|------------------------------------|-----|--------------|-------------------|-----------------|
|     |      |              |                     |                  |                                                         |                    | ASD sample              |                       |                |                               |                 |                                   |     |              |                    |                   | TD sample    |                       |                 |                                    |     |              |                   |                 |
|     |      |              |                     |                  |                                                         |                    | N<br>(male%)            | Sex<br>ratio<br>(M:F) | Age<br>(SD)    | Diagnosis<br>criteria<br>used | SCQ             | IQ (WISC/WAIS); PPVT/BPVS;RSPM/RM |     |              |                    |                   | N<br>(male%) | Sex<br>ratio<br>(M:F) | Age<br>(SD)     | IQ (WISC/WAIS); PPVT/BPVS; RSPM/RM |     |              |                   |                 |
|     |      |              |                     |                  |                                                         |                    |                         |                       |                |                               |                 | FIQ                               | VIQ | PIQ/<br>NVIQ | PPVT/<br>BPVS      | RSPM/<br>RM       |              |                       |                 | FIQ                                | VIQ | PIQ/<br>NVIQ | PPVT/<br>BPVS     | RSPM/<br>RM     |
|     |      |              |                     |                  |                                                         |                    |                         |                       |                |                               |                 |                                   |     |              |                    |                   |              |                       |                 |                                    |     |              |                   |                 |
| 14b | 2014 | Stanutz      | Canada/<br>English  | PC               | A: melodic<br>contour                                   | C                  | 25<br>(76%)             | 19:6                  | 10.67<br>(N/A) | DSM-IV                        | N/A             | >70                               | N/A | N/A          | N/A                | N/A               | 25 (44%)     | 11:14                 | 10.42<br>(N/A)  | N/A                                | N/A | N/A          | N/A               | N/A             |
| 14c | 2014 | Stanutz      | Canada/<br>English  | PM               | A: melodic<br>contour                                   | C                  | 25<br>(76%)             | 19:6                  | 10.67<br>(N/A) | DSM-IV                        | N/A             | >70                               | N/A | N/A          | N/A                | N/A               | 25 (44%)     | 11:14                 | 10.42<br>(N/A)  | N/A                                | N/A | N/A          | N/A               | N/A             |
| 15a | 2015 | Jiang        | China/<br>Mandarin  | PC               | A: melodic<br>contour                                   | C                  | 17                      | N/A                   | 9.41<br>(3.03) | DSM-5<br>(2013)               | 24.29<br>(6.78) | N/A                               | N/A | N/A          | 116 .06<br>(27.17) | 119.12<br>(13.77) | 17           | N/A                   | 9.16<br>(2.76)  | N/A                                | N/A | N/A          | 148.71<br>(16.66) | 122.24<br>(8.5) |
| 15b | 2015 | Jiang        | China/<br>Mandarin  | PCI              | A: melodic<br>contour<br>V: picture of<br>pitch contour | C                  | 17                      | N/A                   | 9.41<br>(3.03) | DSM-5<br>(2013)               | 24.29<br>(6.78) | N/A                               | N/A | N/A          | 116 .06<br>(27.17) | 119.12<br>(13.77) | 17           | N/A                   | 9.16<br>(2.76)  | N/A                                | N/A | N/A          | 148.71<br>(16.66) | 122.24<br>(8.5) |
| 16a | 2015 | Globerson    | Israel/<br>Hebrew   | PDR              | A: pitch interval                                       | C                  | 20<br>(100%)            | 20:0                  | 28.8<br>(6.8)  | ADOS                          | N/A             | N/A                               | N/A | N/A          | N/A                | N/A               | 32<br>(100%) | 32:0                  | 26.2<br>(3.5)   | N/A                                | N/A | N/A          | N/A               | N/A             |
| 16b | 2015 | Globerson    | Israel/<br>Hebrew   | PHD              | A: pitch interval                                       | C                  | 20<br>(100%)            | 20:0                  | 28.8<br>(6.8)  | ADOS                          | N/A             | N/A                               | N/A | N/A          | N/A                | N/A               | 32<br>(100%) | 32:0                  | 26.2<br>(3.5)   | N/A                                | N/A | N/A          | N/A               | N/A             |
| 17a | 2016 | Mayer        | The UK/<br>English  | PHD              | A: melodic<br>contour                                   | C                  | 14<br>(92.86<br>%)      | 13:1                  | 13.8<br>(1.96) | Confirmed<br>diagnosis        | N/A             | N/A                               | N/A | N/A          | 71.50<br>(22.94)   | N/A               | 14<br>(100%) | 14:0                  | 13.53<br>(0.88) | N/A                                | N/A | N/A          | 100.07<br>(16.14) | N/A             |

| Year | First author | Country    | Task                | Stimulus | Response              | Participant information |                    |                            |                  |                               |                |                   |                   |                   |                                   |           |                |          |                 |                  |                   |                  |                                    |     |              |               |             |         |       |      |     |     |              |               |             |
|------|--------------|------------|---------------------|----------|-----------------------|-------------------------|--------------------|----------------------------|------------------|-------------------------------|----------------|-------------------|-------------------|-------------------|-----------------------------------|-----------|----------------|----------|-----------------|------------------|-------------------|------------------|------------------------------------|-----|--------------|---------------|-------------|---------|-------|------|-----|-----|--------------|---------------|-------------|
|      |              |            |                     |          |                       | ASD sample              |                    |                            |                  |                               |                |                   |                   |                   |                                   | TD sample |                |          |                 |                  |                   |                  |                                    |     |              |               |             |         |       |      |     |     |              |               |             |
|      |              |            |                     |          |                       | Language                | paradigm           | modality:<br>stimulus form | option           | N                             | Sex            | Age               | Diagnosis         | SCQ               | IQ (WISC/WAIS); PPVT/BPVS;RSPM/RM |           |                |          |                 | N                | Sex               | Age              | IQ (WISC/WAIS); PPVT/BPVS; RSPM/RM |     |              |               |             |         |       |      |     |     |              |               |             |
|      |              |            |                     |          |                       |                         |                    |                            |                  |                               |                |                   |                   |                   | (male%)                           | ratio     | (SD)           | criteria | used            |                  |                   |                  | FIQ                                | VIQ | PIQ/<br>NVIQ | PPVT/<br>BPVS | RSPM/<br>RM | (male%) | ratio | (SD) | FIQ | VIQ | PIQ/<br>NVIQ | PPVT/<br>BPVS | RSPM/<br>RM |
|      |              |            |                     |          |                       |                         |                    |                            |                  |                               |                |                   |                   |                   |                                   |           |                |          |                 |                  |                   |                  |                                    |     |              |               |             |         |       |      |     |     |              |               |             |
| 17b  | 2016         | Mayer      | The UK/<br>English  | PHD      | A: melodic<br>contour | C                       | 19<br>(78.95<br>%) | 15:4                       | 40.23<br>(11.33) | DSM-IV,<br>ADOS               | N/A            | 113.37<br>(15.27) | 111.16<br>(15.57) | 112.95<br>(12.97) | 105.63<br>(12.07)                 | N/A       | 19<br>(78.95%) | 15:4     | 38.26<br>(9.05) | N/A              | N/A               | N/A              | 106.05<br>(10.24)                  | N/A |              |               |             |         |       |      |     |     |              |               |             |
| 18   | 2017         | Cheng      | China/<br>Cantonese | PHD      | A: pitch interval     | C                       | 20<br>(85%)        | 17:3                       | 25<br>(3.22)     | DSM-III,<br>ICD-10,<br>ADOS-2 | N/A            | N/A               | N/A               | N/A               | N/A                               | N/A       | 20 (85%)       | 17:3     | 24<br>(3.6)     | N/A              | N/A               | N/A              | N/A                                | N/A |              |               |             |         |       |      |     |     |              |               |             |
| 19   | 2019         | Germain    | Canada/<br>English  | PDR      | A: pitch interval     | C                       | 17<br>(100%)       | 17:0                       | 13.7<br>(2.3)    | DSM-IV,<br>ADOS               | N/A            | 110.8<br>(18.3)   | N/A               | N/A               | N/A                               | N/A       | 19<br>(42.11%) | 8:11     | 12.9<br>(2.3)   | 115.8<br>(8.1)   | N/A               | N/A              | N/A                                | N/A |              |               |             |         |       |      |     |     |              |               |             |
| 20   | 2019         | Schelinski | German/<br>Germany  | PC       | A: melodic<br>contour | C                       | 16<br>(81.25<br>%) | 13:3                       | 33.75<br>(10.12) | ICD-10,<br>ADOS,<br>ADI-R     | 20.33<br>(5.7) | 110.31<br>(13.79) | 110.75<br>(12.35) | 107.38<br>(17.55) | N/A                               | N/A       | 16<br>(81.25%) | 13:3     | 33.69<br>(9.58) | 111.5<br>(10.97) | 108.75<br>(12.59) | 112.69<br>(9.59) | N/A                                | N/A |              |               |             |         |       |      |     |     |              |               |             |
| 21   | 2019         | Jamey      | Canada/<br>English  | PC       | A: melodic<br>contour | C                       | 19<br>(100%)       | 19:0                       | 10.4<br>(1.6)    | ADOS,<br>ADI-R                | 19.5<br>(5.2)  | 118.6<br>(14.5)   | 114.8<br>(13.3)   | 119.4<br>(17)     | N/A                               | N/A       | 21<br>(100%)   | 21:0     | 9.8<br>(1.8)    | 122.2<br>(11.2)  | 115.1<br>(12)     | 122.9<br>(15.41) | N/A                                | N/A |              |               |             |         |       |      |     |     |              |               |             |
| 22   | 2021         | Weiss      | Canada/<br>English  | PM       | A: melodic<br>contour | C                       | 26<br>(84.62<br>%) | 22:4                       | 11.1<br>(1.4)    | DSM-IV                        | N/A            | N/A               | N/A               | N/A               | N/A                               | N/A       | 26<br>(88.46%) | 23:3     | 10.7<br>(1.5)   | N/A              | N/A               | N/A              | N/A                                | N/A |              |               |             |         |       |      |     |     |              |               |             |

Note: (1) Abbreviations: PC = pitch contour discrimination task; PCI = pitch contour identification task; PCD = pitch chord disembedding task; PDR = pitch direction recognition task; PHD = pitch height discrimination task; PL: pitch labelling task; PM = pitch memory task; PN= pitch naming task; A = auditory; V = visual; C = choice; L = labeling; ASD = autism spectrum disorder; TD = typically developing people; DSM = Diagnostic and Statistical Manual of Mental Disorders; ADOS = Autism Diagnostic Observation Schedule; ADI-R = Autism Diagnostic Interview-Revised; ICD = International and Statistical Classification of Diseases and Related Health Problems; WAIS = Wechsler Adult Intelligence Scale/Wechsler Abbreviated Scale of Intelligence; WISC = Wechsler Intelligence Scale for children; FIQ = Full-Scale IQ; VIQ = Verbal IQ; PIQ = Performance IQ;

PPVT = Peabody Picture Vocabulary Test; BPVS = British Picture Vocabulary Scale; RSPM = Raven’s Standard Progressive Matrices; RM = Raven’s Matrices; M = male; F = female; SCQ = Social Communication Questionnaire; N/A = not available; M = mean value; SD = standard deviation. (2) Information on study characteristics involves only the tasks included into the review.
