# Supplementary material
Source: publisher figshare collection journal article supplement (https://asha.figshare.com/articles/dataset/_/21614271)
Supplement: Supplementary file 8 [file 1]

**Supplemental Material S8.** Results of the meta-regression analyses.

| <b>Moderator</b>           | <b>Coefficient (<math>\beta</math>)</b> | <b>95% CI</b>   | <b><i>p</i> value</b> |
|----------------------------|-----------------------------------------|-----------------|-----------------------|
| <b>Participant-related</b> |                                         |                 |                       |
| Mean age                   | -0.02                                   | -0.04 to -0.005 | .014*                 |
| Percentage of men          | 1.18                                    | -1.21 to 3.58   | .33                   |
| Full-scale IQ              | -0.02                                   | -0.05 to 0.01   | .18                   |
| Verbal IQ                  |                                         |                 |                       |
| WASI                       | 0.005                                   | -0.02 to 0.03   | .67                   |
| PPVT/BPVS                  | 0.001                                   | -0.02 to 0.02   | .91                   |
| Non-verbal IQ              |                                         |                 |                       |
| WASI                       | 0.009                                   | -0.02 to 0.03   | .48                   |
| RSPM/RM                    | 0.01                                    | 0.002 to 0.03   | .03*                  |
| AQ                         | -0.04                                   | -0.10 to 0.02   | .17                   |
| SCQ                        | 0.14                                    | -0.02 to 0.29   | .08                   |
| <b>Language background</b> |                                         |                 |                       |
| Non-tonal                  |                                         | Reference       |                       |
| tonal                      | 0.16                                    | -0.41 to 0.74   | .58                   |
| <b>Methodology-related</b> |                                         |                 |                       |
| <b>Task type</b>           |                                         |                 |                       |
| PC                         |                                         | Reference       |                       |
| PCD                        | 0.25                                    | -0.42 to 0.91   | .46                   |
| PCI                        | 0.60                                    | -0.17 to 1.38   | .13                   |
| PDR                        | -0.09                                   | -0.66 to 0.49   | .77                   |
| PHD                        | -0.03                                   | -0.51 to 0.45   | .89                   |
| PL                         | 0.21                                    | -0.65 to 1.06   | .63                   |
| PM                         | 0.15                                    | -0.40 to 0.70   | .59                   |
| PN                         | 1.51                                    | -0.85 to 3.88   | .21                   |

|                                      |         |                 |       |
|--------------------------------------|---------|-----------------|-------|
| <b>Stimulus form</b>                 |         |                 |       |
| Isolated tone                        |         | Reference       |       |
| Pitch interval                       | -0.53   | -1.05 to -0.01  | .046* |
| Melodic contour                      | -0.32   | -0.81 to 0.16   | .19   |
| <b>Stimulus modality</b>             |         |                 |       |
| Auditory                             |         | Reference       |       |
| Audiovisual                          | 0.30    | -0.06 to 0.67   | .11   |
| <b>Number of trials</b>              | -0.0004 | -0.004 to 0.003 | .82   |
| <b>Number of answer options</b>      | 0.04    | -0.06 to 0.13   | .46   |
| <b>Absolute pitch/Relative pitch</b> |         |                 |       |
| Absolute pitch                       |         | Reference       |       |
| Relative pitch                       | -0.25   | -0.60 to 0.09   | .15   |
| <b>Study-related</b>                 |         |                 |       |
| <b>Year of publication</b>           | -0.04   | -0.06 to -0.01  | .004* |
| <b>Region</b>                        |         |                 |       |
| Asia                                 |         | Reference       |       |
| North America                        | -0.03   | -0.57 to 0.51   | .92   |
| Europe                               | 0.03    | -0.45 to 0.51   | .90   |

Note: CI = confidence interval; PC = pitch contour discrimination task; PCI = pitch contour identification task; PCD = pitch chord disembedding task; PDR = pitch direction recognition task; PHD = pitch height discrimination task; PL = pitch labelling task; PM = pitch memory task; PN = pitch naming task; \* $p < .05$ .
