# Supplementary material
Source: publisher figshare collection journal article supplement (https://asha.figshare.com/articles/dataset/_/21614271)

**Supplemental Material S6.** Contour-enhanced meta-analysis funnel plots.

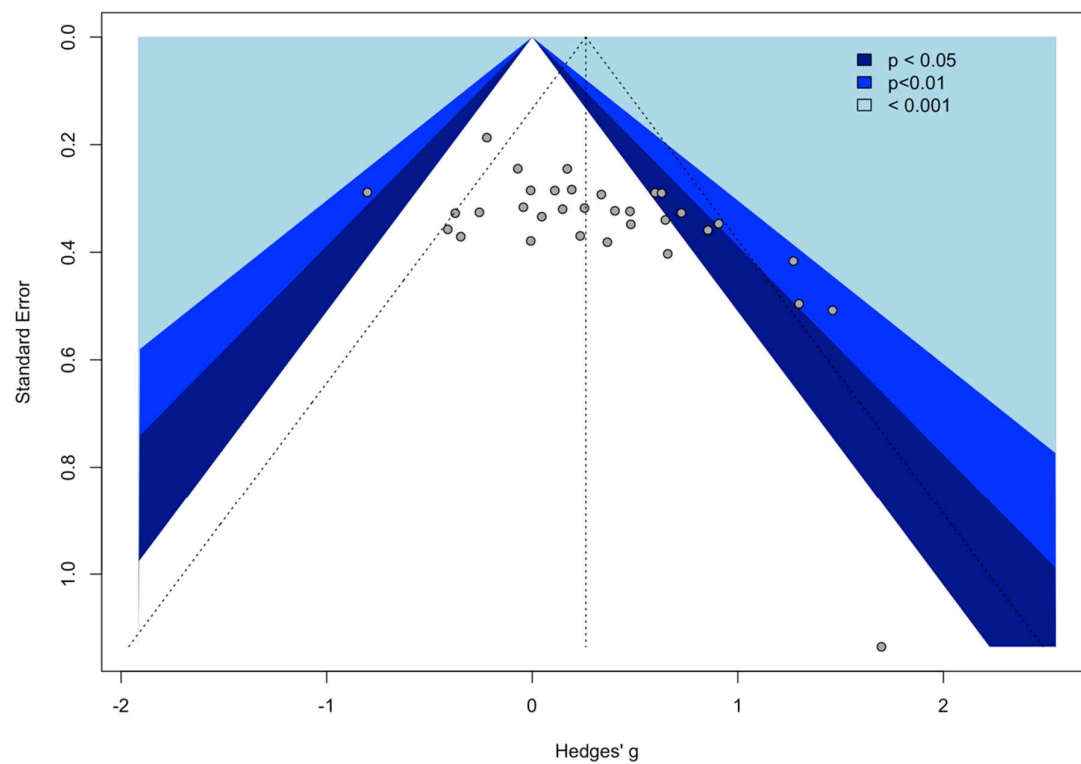

Supplement: Supplementary file 1 [file 1]
